# Supplementary material for: Increased Mer and Axl receptor tyrosine kinase expression on glomeruli in lupus nephritis
Source: Springer Nature journal article supplement (doi:10.1007/s10067-017-3550-8), 2017-01-26
Supplement: MOESM1 [file 12021176]

Table 1. Demographic and clinical characteristics of LN patients

| features |  | LN patients n=29 |
| --- | --- | --- |
| Gender(M/F) |  | 6/23 |
| Age (y) |  | 37.34±14.28 |
| Disease duration(m) |  | 18(2,90) |
| Malar rash |  | 14 |
| Discoid lesions |  | 3 |
| Photosensitivity |  | 9 |
| Oral ulcer |  | 6 |
| Arthritis |  | 15 |
| Serositis |  | 4 |
| Hematological disorder |  | 17 |
| Neuropsychiatric disorder |  | 0 |
| RBC in urine(/ul) |  | 155.27±232.47 |
| Cast in urine(/ul) |  | 3.20±5.85 |
| 24h urine protein (g) |  | 5.09±4.36 |
| Cre(mmol/L) |  | 66(48.5,131.5) |
| e-GFR(ml/min/1.73m2) |  | 91.27±49.66 |
| ESR(mm/h) |  | 47.61±27.81 |
| CRP(mg/l) |  | 4.11(1.86,6.11) |
| IgG(g/ml) |  | 11.72±5.83 |
| IgA(g/ml) |  | 2.56±1.03 |
| IgM(g/ml) |  | 0.96±0.63 |
| C3(g/ml) |  | 0.57±0.33 |
| C4(g/ml) |  | 0.12±0.10 |
| ds-DNA Ab(IU/ml) |  | 309.86±283.40 |
| Pathological classification | III | 4 |
|  | IV | 21 |
|  | V | 4 |

Cre: serum creatinine, e-GFR: estimated glomerular filtration rate, III: focal LN, IV: diffuse LN, V: membranous LN
